# Supplementary material
Source: Springer Nature journal article supplement (https://www.springermedizin.de/resource/supplementary/12911_2009_304_MOESM4_ESM.pdf/9525492)
Supplement: MOESM4 [file 9525492]

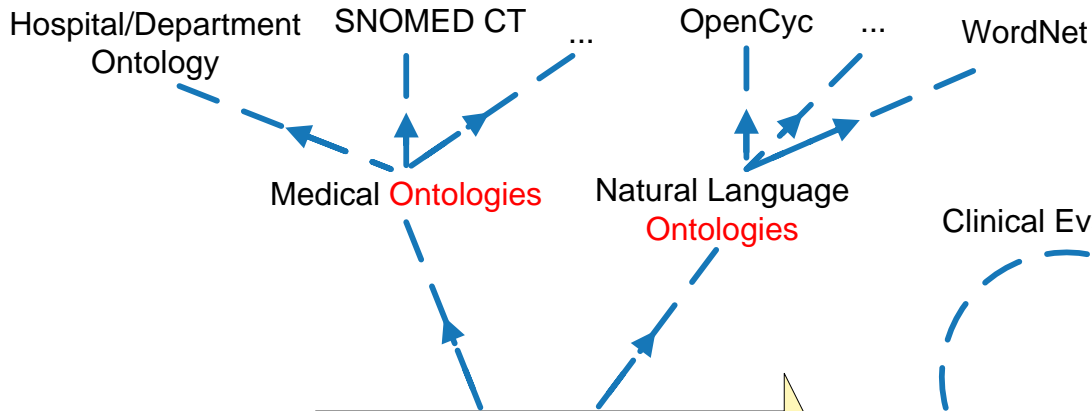

XML-based Flow Chart of Clinical Protocol

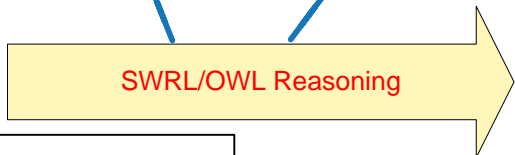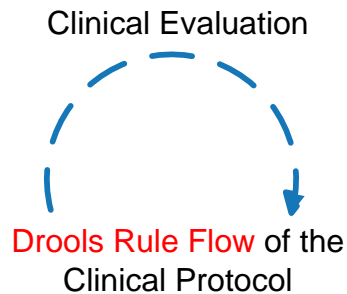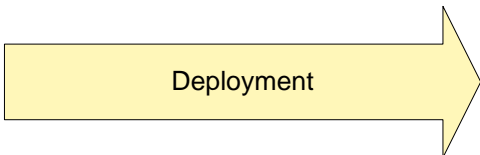

Service of the Clinical Protocol

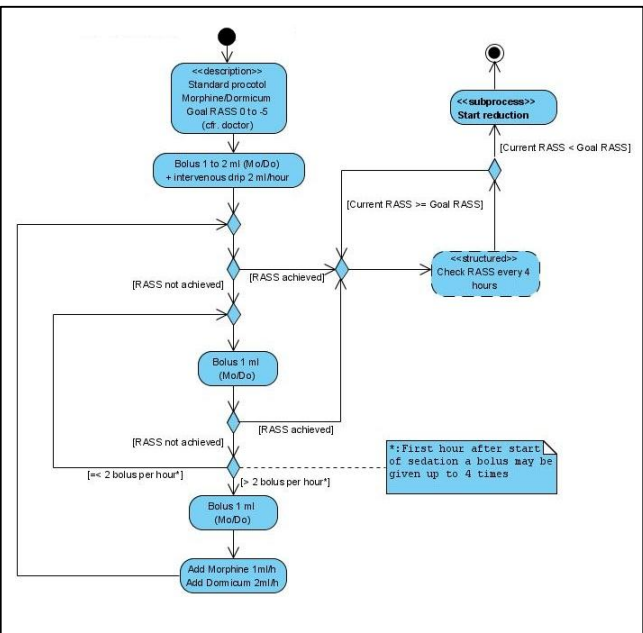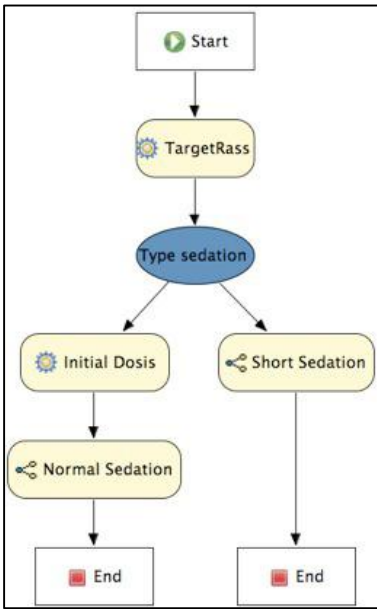

```

public class SedationRunner {
    public SedationRunner() {
        try {
            kbase = createKnowledgeBase();
            createWorkingMemory();
            logger = KnowledgeRuntimeLoggerFactory.
                newFileLogger(ksession, "log.txt");
            ksession.startProcess(
                "sedation.normalflow", parameters);
            ksession.fireAllRules();
            logger.close();
        } catch (Throwable t) {
            t.printStackTrace();
        }
    }
    ...
}

```
